# Supplementary material
Source: PubMed Central journal article supplement (PMC3102397)
Supplement: 1100620108_pnas.201100620SI.pdf [file 1100620108_pnas.201100620SI.pdf]

# Supporting Information

Powis et al. 10.1073/pnas.1100620108

## SI Text

**Laboratory Analysis: Detailed Presentation of Methods.** Quantities of burr (90–200 mg) were extracted from each sample vial using stainless steel spatulas that were cleaned after each procedure to prevent potential cross-contamination during the analytical phase. Samples were incubated with 200 to 300  $\mu\text{L}$  milli-Q water at 80 °C for 30 min. After incubation, samples were vortexed and centrifuged. The resulting sediment from each sample was removed and the supernatant filtered using 5-kDa membrane filters. Filtrates were transferred to vials for UPLC/MS-MS analysis. Two unknowns supplied to the University of California Davis laboratory by T.G.P. (modern pottery samples) were prepared similarly and included in the analysis as controls.

Subsequently, a Xevo-TQ triple quadrupole mass spectrometer (Waters) recorded MS and MS-MS spectra using Electro Spray Ionization in positive ion mode, capillary voltage of 3.0 kV, extractor cone voltage of 3 V, sample cone voltage of 32 V, and detector voltage of 500 V. Cone gas flow was set at 50 L/h and desolvation gas flow was maintained at 600 L/h. Source temperature and desolvation temperatures were set at 150 and 500 °C, respectively. The collision energy was varied from 16 to 26 to optimize four different daughter ions. The acquisition range was 20 to 300 Da. Pure theobromine was introduced to the source at a flow rate of 10  $\mu\text{L}/\text{min}$  by using methanol:water (1:1) and 0.1% formic acid mixture as the carrier solution to develop multiple reaction monitoring method for UPLC/MS-MS operation (Fig. 2).

UPLC/MS-MS analyses of all of the samples were conducted using a Waters Acquity UPLC system connected with Xevo-TQ triple quadrupole mass spectrometer. Analytical separations on the UPLC system were conducted using an Acquity UPLC HSS T3 1.7- $\mu\text{m}$  column (1  $\times$  150 mm) at a flow rate of 0.15 mL/min. The gradient started with 100% A (0.1% formic acid in  $\text{H}_2\text{O}$ ) and 0% B (0.1% formic acid in  $\text{CH}_3\text{CN}$ ), changed to 50% A over 3 min, followed by a 4-min linear gradient to 10% A, resulting in a total separation time of 7 min. The elutions from the UPLC column were introduced to the mass spectrometer and resulting data were analyzed and processed using MassLynx 4.1 software. Pure theobromine was used to optimize the UPLC conditions before analysis.

The UPLC/MS-MS analyses of the Olmec samples clearly showed the presence of a peak at 2.20 min (Fig. 3D) that matched well with the standard for theobromine (Fig. 3B), whereas no peaks were observed at 2.20 min in extracts from the two modern pottery control samples. We used four different multiple reaction monitoring transitions to independently confirm theobromine in the sample extracts. Indeed, all of the four multiple reaction monitoring chromatograms of theobromine-positive Olmec samples showed a peak at 2.20 min (Fig. 3D), which unequivocally confirmed its presence. A significant quantity of theobromine was found in eight samples (# 85, 97, 110, 119, 122, 125, 145, and 146), although theobromine also was present in trace amounts in an additional 19 samples. The remainder of the samples ( $n = 127$ ) showed no detectable peaks at 2.20 min.

**Summary of Sampled Pottery Types and Forms. Ojochi phase samples.** Ojochi phase samples ( $n = 21$ ) included bottles, incurved-rim bowls, neckless jars, and open bowls. Most were undecorated ( $n = 17$ ); a minority ( $n = 4$ ) exhibited fluting or punctates. The relative proportion of types for this phase corresponded to Acamaya red (43%), Caimán polished (38%), Chaya punctate (5%), Conchuda specular red (10%), and Delfín smoothed (5%).

**Bajío phase samples.** Bajío phase samples ( $n = 27$ ) encompassed bottles, closed forms, incurved-rim bowls, necked jars, neckless jars, and open bowls. Decorative modes ( $n = 17$ ) included wide incision, finger-impression, fluting, punctates, ridging, and rocker-stamping with the majority of these lacking plastic decoration. The proportion of types was Acamaya red (7%), Caamaño coarse (4%), Caimán polished (52%), Chaya punctate (7%), Cocodrilo smoothed (4%), Garza smoothed (4%), Eroded gray (4%), Pochitoca polished (11%), Tigrillo black and white (4%), and Xochiltepec white (4%).

**Chicharras phase materials.** Chicharras phase materials ( $n = 37$ ) comprised bottles, closed forms, incurved rim bowls, necked jars, neckless jars, and open bowls. Most ( $n = 22$ ) were undecorated; a minority ( $n = 15$ ) showed fluting, punctates, thin or wide incision, rocker-stamp, and fingernail impressions. The proportion of types was Acamaya red (5%), Caimán polished (14%), Chipó red (5%), Conchuda specular red (24%), Garza smoothed (14%), Pochitoca polished (3%), Tejón white (3%), Reburnt Tigrillo (3%), Tigrillo black and white (19%), Tigrillo monochrome (8%), and Xochiltepec white (3%).

**San Lorenzo A phase samples.** San Lorenzo A phase samples ( $n = 21$ ) included bottles, closed forms, incurved-rim bowls, a low annular-based open vessel, necked jars, neckless jars, and open bowls. Incising, punctates, finger impressions, ridging, rocker-stamp, modeled applications were present in the majority ( $n = 21$ ), and the minority ( $n = 9$ ) exhibited no decoration. The proportion of types was Caimán polished (5%), Chaya punctate (5%), Chipó red (5%), Conchuda specular red (5%), Garza smoothed (14%), Peje micaceous (5%), Pochitoca polished (10%), Tejón white (5%), Tigrillo black and white (10%), Tigrillo monochrome (24%), Tigrillo white-rimmed black (10%), and Xochiltepec white (5%).

**San Lorenzo B phase samples.** San Lorenzo B phase samples ( $n = 50$ ) included a bottle, closed forms, a collared jar, cups, a handle/lug/support, incurved-rim bowls, a low annular-based open vessel, necked jars, neckless jars, small cups, and open bowls. The variety of decoration ranged from wide and thin-line incision and fingernail impressions to effigy modeling and applications, but approximately half ( $n = 22$ ) were undecorated. The proportion of types included: Caamaño coarse (4%), Chipó red (2%), Conchuda specular red (4%), Conejo orange-on-white (2%), Garza smoothed (6%), Eroded gray (10%), Mulato black (4%), Pochitoca polished (2%), Tejón white (14%), Tiburón white (2%), Reburnt Tigrillo (4%), Tigrillo black and white (10%), Tigrillo monochrome (26%), Tigrillo white-rimmed black (6%), and Xochiltepec white (4%).

**Table S1. Total sampled ceramic types by phase**

| Type                        | Ojochi | Bajío | Chicharras | San Lorenzo A | San Lorenzo B | Total |
|-----------------------------|--------|-------|------------|---------------|---------------|-------|
| Acamaya red                 | 9      | 2     | 2          |               |               | 13    |
| Caamaño coarse              |        | 1     |            |               | 2             | 3     |
| Caimán polished             | 8      | 14    | 5          | 1             |               | 28    |
| Chaya punctate              | 1      | 2     |            | 1             |               | 4     |
| Chipo red                   |        |       | 2          | 1             | 1             | 4     |
| Cocodrilo smoothed          |        | 1     |            |               |               | 1     |
| Conchuda specular red       | 2      |       | 9          | 1             | 2             | 14    |
| Conejo orange-on-white      |        |       |            |               | 1             | 1     |
| Delfín smoothed             | 1      |       |            |               |               | 1     |
| Eroded gray                 |        | 1     |            |               | 5             | 6     |
| Garza smoothed              |        | 1     | 5          | 3             | 3             | 12    |
| Mulato black                |        |       |            |               | 2             | 2     |
| Peje Micaceous              |        |       |            | 1             |               | 1     |
| Pochitoca polished          |        | 3     | 1          | 2             | 1             | 7     |
| Reburnt tigrillo            |        |       | 1          |               | 2             | 3     |
| Tejón white                 |        |       | 1          | 1             | 7             | 9     |
| Tiburón white               |        |       |            |               | 1             | 1     |
| Tigrillo black and white    |        | 1     | 7          | 2             | 5             | 15    |
| Tigrillo monochrome         |        |       | 3          | 5             | 13            | 21    |
| Tigrillo white-rimmed black |        |       |            | 2             | 3             | 5     |
| Xochiltepec white           |        | 1     | 1          | 1             | 2             | 5     |
| Total                       | 21     | 27    | 37         | 21            | 50            | 156   |

**Table S2. Total sampled pottery forms by phase**

| Pottery forms                 | Ojochi | Bajío | Chicharras | San Lorenzo A | San Lorenzo B | Total |
|-------------------------------|--------|-------|------------|---------------|---------------|-------|
| Bottle                        | 4      | 4     | 3          | 1             | 1             | 13    |
| Closed form                   |        | 3     | 9          | 4             | 4             | 20    |
| Collared jar                  |        |       | 1          |               | 1             | 2     |
| Cup                           |        |       |            |               | 2             | 2     |
| Handle/lug/support            |        |       |            |               | 1             | 1     |
| Incurved rim bowl             | 3      | 3     | 3          | 1             | 5             | 15    |
| Ladle                         |        |       |            |               | 1             | 1     |
| Low annular based open vessel |        |       |            | 1             | 1             | 2     |
| Necked jar                    |        | 3     | 1          |               | 2             | 6     |
| Neckless jar                  | 2      | 2     | 4          | 2             | 4             | 14    |
| Open bowl                     | 12     | 12    | 16         | 10            | 17            | 67    |
| Small cup                     |        |       |            | 2             | 11            | 13    |
| Total                         | 21     | 27    | 37         | 21            | 50            | 156   |
